# Supplementary material for: Dromedary camel nanobodies broadly neutralize SARS-CoV-2 variants
Source: PubMed Central journal article supplement (PMC9170159; doi:10.1073/pnas.2201433119), 2022-04-27
Supplement: pnas.2201433119.sapp.pdf [file pnas.2201433119.sapp.pdf]

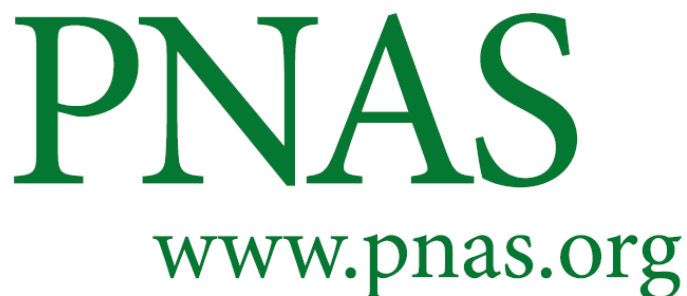

**Supplementary Information for  
Dromedary camel nanobodies broadly neutralize SARS-CoV-2 variants**

Jessica Hong<sup>1#</sup>, Hyung Joon Kwon<sup>2#</sup>, Raul Cachau<sup>3#</sup>, Catherine Z. Chen<sup>4</sup>, Kevin John Butay<sup>5</sup>, Zhijian Duan<sup>6</sup>, Dan Li<sup>1</sup>, Hua Ren<sup>1</sup>, Tianyuzhou Liang<sup>1</sup>, Jianghai Zhu<sup>3</sup>, Venkata P. Dandey<sup>5</sup>, Negin Martin<sup>7</sup>, Dominic Esposito<sup>8</sup>, Uriel Ortega-Rodriguez<sup>2</sup>, Miao Xu<sup>4</sup>, Mario J. Borgnia<sup>5\*</sup>, Hang Xie<sup>2\*</sup>, Mitchell Ho<sup>1,6\*</sup>

Correspondence to: [homi@mail.nih.gov](mailto:homi@mail.nih.gov) (Lead correspondence)

[mario.borgnia2@nih.gov](mailto:mario.borgnia2@nih.gov)

[Hang.Xie@fda.hhs.gov](mailto:Hang.Xie@fda.hhs.gov)

**This PDF file includes:**

Figs. S1 to S15

Tables S1 to S5

7A3 QVQLVESGGGSVQPGGSLRLS**C**VVS**GYTSSSR**YMGWFRQVPGKGLEWVS**G****IKRDGTNT**YYADSVKGR  
 8A4 EVQLVESGGGLVQPGESLRLS**C**EAS**GFTFSSV**YMSWVRQAPGKGLEWIS**T****HPAGGST**YYADSMKDR  
 1B5 DVQLVESGGGSVQAGGSLRLS**C**TGS**RYTYS**TY**C**MGWFRQAPGK~~EE~~EAVA**I****NSGGGEP**YYGDSVKGRF  
 8A2 AVQLVDSGGGSVQAGGSLRLS**C**AAS**GYTYS****I****CT**MGWYRQAPGEGLEWVS**G****INADGSNT**HYTDSVKGR  
 2F7 QVKLEESGGGSVQSGGSLRLS**C**TVS**RDTNTN****I****NR****C**MGWFRQAPGKGL**E**TVA**T****INRDGTNT**YYTDAVKGR  
 1H6 AVQLVDSGGGSVQAGGSLNLS**C**VAS**GTTLRNG****C**MAWFRQVPGKEREVVA**I****IRATS**YTDYADSVKGR

|     |                                                                                       |     |
|-----|---------------------------------------------------------------------------------------|-----|
| 7A3 | FTISQDNAKNTVYLQMNSLKPEDTAMYY <b>CAAGSWYNQWGY</b> <u><b>SMDY</b></u> WGKGTQVTVSS       | 122 |
| 8A4 | FTISRDNAKNTLYLQMNSLKSEDTALYY <b>CII</b> <u><b>EALSGY</b></u> RGPGTQVTVSS              | 115 |
| 1B5 | FTISQDRAKNTVYLQMDGLQPDDTAIYY <b>CVAADSHNSR</b> <u><b>CYLGRSYVNY</b></u> WGQGTQVTVSS   | 126 |
| 8A2 | FTISRDNAKNTLYLQMNSLKPEDTAIYY <b>CAAHGTYDKYAP</b> <u><b>CGGFAGTYTY</b></u> WGQGTQVTVSS | 128 |
| 2F7 | FTISQDNVKNNTVYLQMNNLTPEDTGTYY <b>CNAMGRGSGSR</b> <u><b>CDNWDPNY</b></u> WGQGTQVTVSS   | 127 |
| 1H6 | FTISQDNAKNTVYLQMKSLTPEDTATYY <b>CAATLYRVN</b> <u><b>CAKREFDK</b></u> WGQGTQVTVSS      | 123 |

IMGT, Kabat, Paratome

**Fig. S1.** Sequence alignment of the top 6 V<sub>H</sub>H with CDR regions bolded for IMGT, italicized for Kabat, and underlined for Paratome. The cysteines are highlighted in red. All the V<sub>H</sub>H sequences are also listed in provisional patent application no. PCT/US2021/056548.

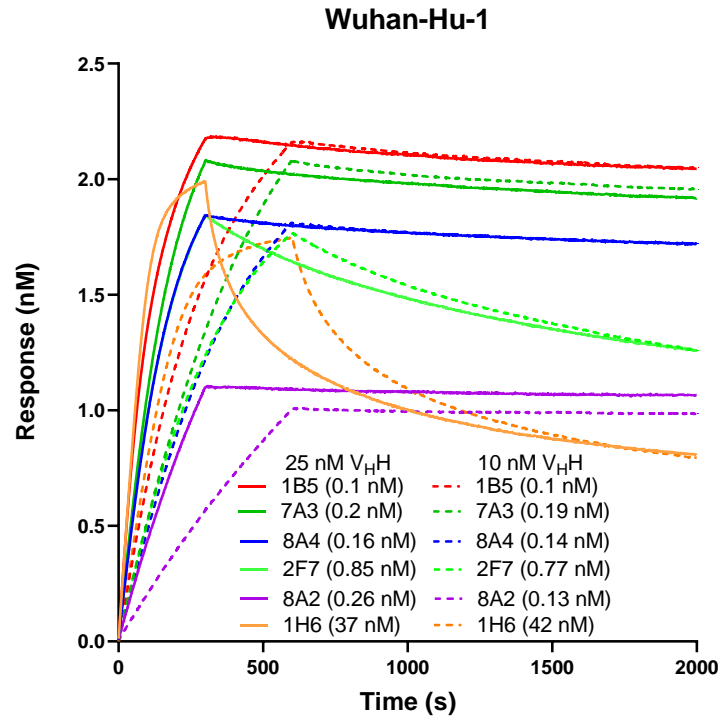

| $V_{HH}$ | Conc. (nM) | $K_D$ (M) | $K_D$ Error | $K_{on}$ (1/Ms) | $K_{on}$ Error | $K_{dis}$ (1/s) | $K_{dis}$ Error |
|----------|------------|-----------|-------------|-----------------|----------------|-----------------|-----------------|
| 1B5      | 25         | 1.00E-10  | <1E-12      | 3.40E+05        | 5.40E+02       | 3.70E-05        | <1e-7           |
| 7A3      | 25         | 2.00E-10  | 1.13E-12    | 2.00E+05        | 5.30E+02       | 4.30E-05        | 1.50E-07        |
| 8A4      | 25         | 1.80E-10  | 1.00E-12    | 2.32E+05        | 5.20E+02       | 3.70E-05        | 4.50E-07        |
| 2F7      | 25         | 8.50E-10  | 6.70E-12    | 2.60E+05        | 1.80E+03       | 2.20E-04        | 7.20E-07        |
| 8A2      | 25         | 2.60E-10  | 1.80E-12    | 7.40E+04        | 2.40E+02       | 1.90E-05        | 3.60E-07        |
| 1H7      | 25         | 3.70E-08  | 2.00E-12    | 8.30E+05        | 2.50E+03       | 5.40E-03        | 5.20E-07        |
| 1B5      | 10         | 1.10E-10  | <1e-12      | 3.20E+05        | 3.00E+02       | 3.40E-05        | <1e-7           |
| 7A3      | 10         | 1.90E-10  | 1.10E-12    | 2.00E+05        | 4.70E+02       | 3.80E-05        | 6.00E-07        |
| 8A4      | 10         | 1.40E-10  | <1e-12      | 2.40E+05        | 4.50E+02       | 3.40E-05        | 2.70E-07        |
| 2F7      | 10         | 7.70E-10  | 5.00E-12    | 3.00E+05        | 1.60E+03       | 2.20E-04        | 3.20E-07        |
| 8A2      | 10         | 1.30E-10  | 1.00E-12    | 8.70E+04        | 1.70E+02       | 1.20E-05        | 1.50E-07        |
| 1H7      | 10         | 4.20E-08  | 1.30E-12    | 8.30E+05        | 1.60E+03       | 5.40E-03        | 8.70E-07        |

**Fig. S2.** The binding avidity of  $V_{HH}$ -hFc against the RBD of Wuhan-Hu-1. The  $K_D$  values were measured on Octet using two concentrations (10 and 25 nM) of the  $V_{HH}$ -hFc protein. Conc, concentration.

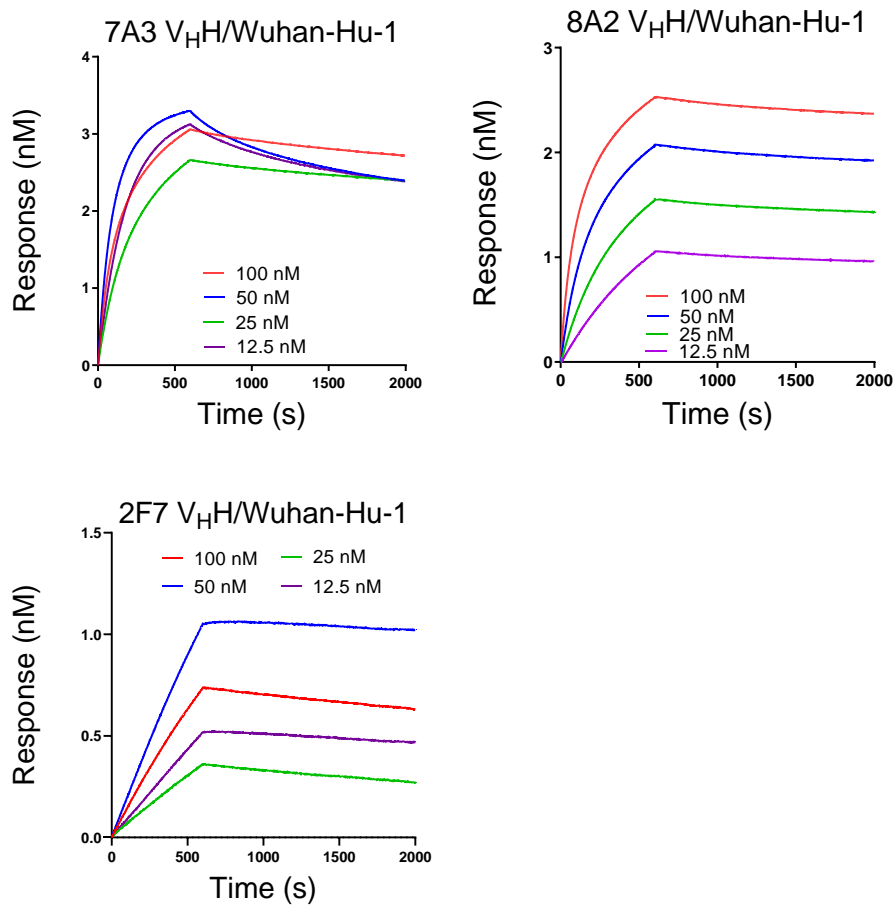

| V <sub>H</sub> H | Conc. (nM) | KD (M)   | KD Error | Kon (1/Ms) | Kon Error | Kdis (1/s) | Kdis Error |
|------------------|------------|----------|----------|------------|-----------|------------|------------|
| 7A3              | 100        | 7.00E-10 | 1.03E-11 | 6.20E+04   | 2.20E+02  | 4.30E-05   | 6.20E-07   |
| 7A3              | 50         | 4.30E-10 | 3.60E-12 | 8.20E+04   | 1.55E+02  | 3.50E-05   | 2.90E-07   |
| 7A3              | 25         | 5.00E-10 | 1.30E-12 | 9.50E+04   | 1.20E+02  | 6.70E-05   | 1.40E-07   |
| 7A3              | 12.5       | 1.70E-10 | <1e-12   | 1.00E+05   | 1.64E+03  | 1.70E-05   | <1e-7      |
| 8A2              | 100        | 2.41E-10 | 1.11E-11 | 6.32E+04   | 2.53E+02  | 1.52E-05   | 6.95E-07   |
| 8A2              | 50         | 7.64E-10 | 4.41E-12 | 8.96E+04   | 2.00E+02  | 6.85E-05   | 3.65E-07   |
| 8A2              | 25         | 8.05E-10 | 2.31E-12 | 1.10E+05   | 1.83E+02  | 8.85E-05   | 2.07E-07   |
| 8A2              | 12.5       | 1.30E-09 | 5.81E-12 | 9.45E+04   | 3.77E+02  | 1.23E-04   | 2.49E-07   |
| 2F7              | 100        | 1.70E-09 | 1.30E-11 | 9.70E+04   | 4.90E+02  | 1.70E-04   | 9.50E-07   |
| 2F7              | 50         | 1.20E-09 | 8.10E-12 | 1.10E+05   | 4.60E+02  | 1.40E-04   | 7.40E-07   |
| 2F7              | 25         | 7.50E-10 | 4.40E-12 | 1.20E+05   | 3.80E+02  | 8.90E-05   | 4.20E-07   |
| 2F7              | 12.5       | 3.00E-10 | 1.00E-12 | 1.00E+05   | 1.50E+02  | 3.00E-05   | <1e-7      |

**Fig. S3.** The binding affinity of camel V<sub>H</sub>Hs against the RBD of Wuhan-Hu-1 on Octet. The 7A3, 8A2, and 2F7 V<sub>H</sub>Hs were expressed in *E. coli* and purified on a nickel column. The binding affinity of the camel V<sub>H</sub>Hs on the spike protein of Wuhan-Hu-1 was measured on Octet using the RBD protein. Conc, concentration.

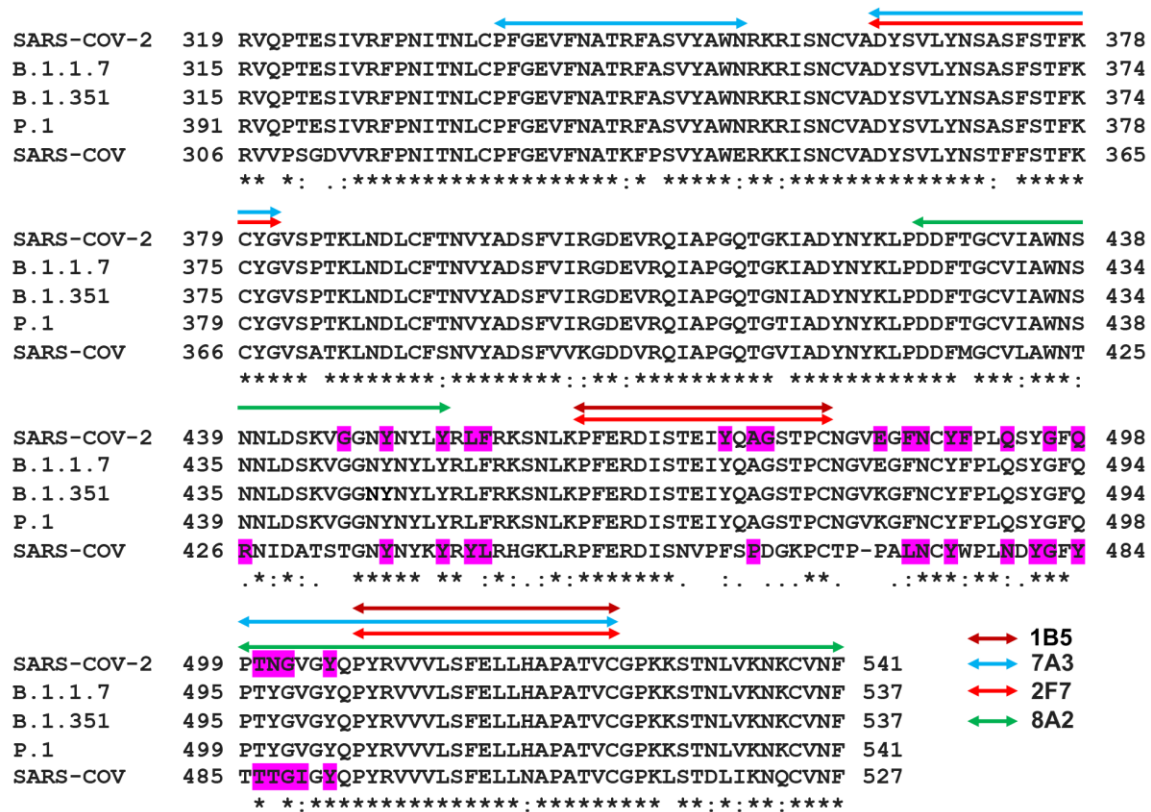

**Fig. S4.** Epitope mapping of anti-SARS-CoV-2 RBD V<sub>H</sub>Hs. Sequence alignment of RBD region of SARS-CoV-2, SARS-CoV, and three identified variant strains of SARS-CoV-2 (B.1.1.7 EPI\_ISL\_601443, B.1.351 EPI\_ISL\_700428, and P.1 EPI\_ISL\_792680). The conserved residues are marked with asterisks (\*), the residues with similar properties between variants are marked with the colon symbol (:), and the residues with marginally similar properties are marked with the period symbol (.). The main residues of both SARS-CoV-2 and SARS-CoV RBD region identified previously that interact with ACE2 are shaded in magenta. Arrows of different lengths and colors represent possible positions of V<sub>H</sub>H contact on the RBD.

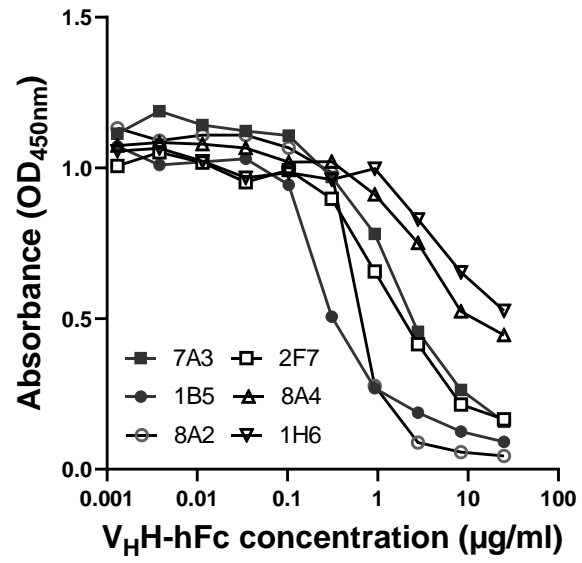

**Fig. S5.** Inhibition effect of V<sub>H</sub>H nanobodies against the interaction of the RBD and the human ACE2 protein by ELISA.

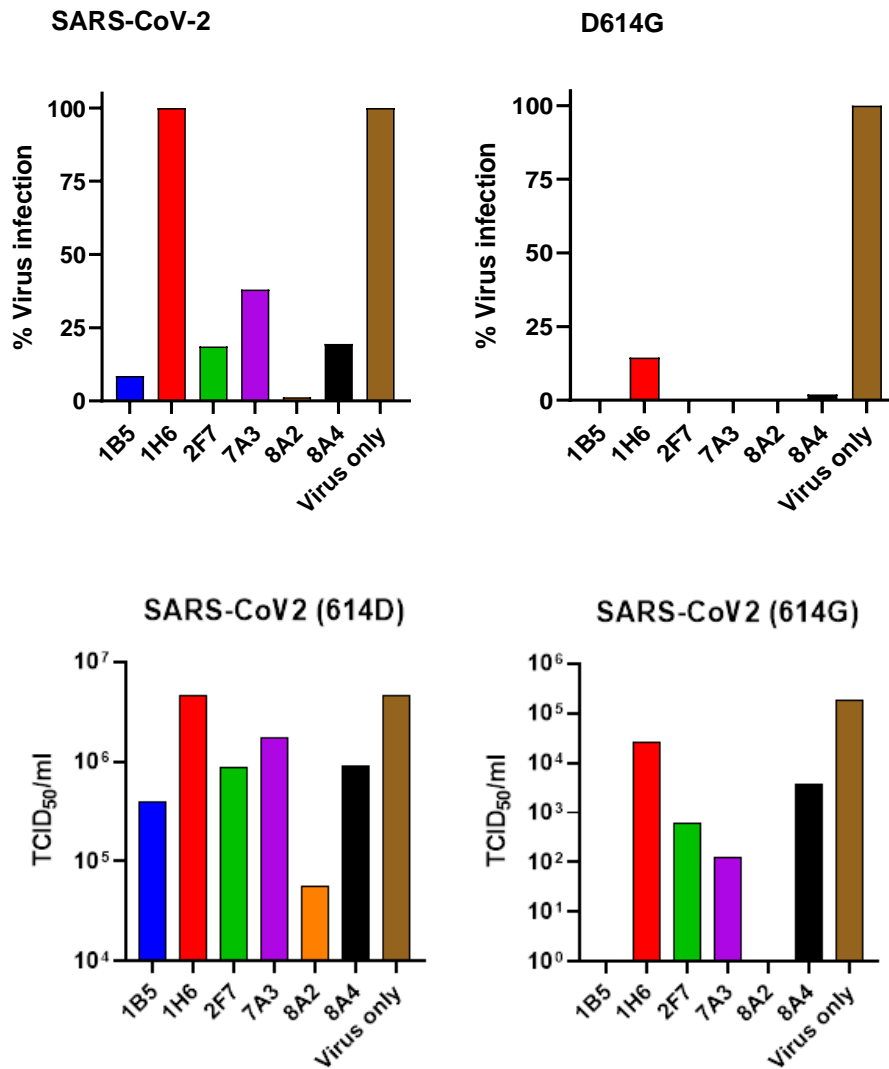

**Fig. S6.** Prescreening V<sub>H</sub>H-hFc fusion proteins at 10 μg/ml against live SARS-CoV-2 bearing 614D or 614G. V<sub>H</sub>H-hFc fusion proteins at the concentration of 10 μg/ml were incubated with 10<sup>2</sup> TCID<sub>50</sub> of live SARS-CoV-2 or the 614G variant at room temperature for 1 h. Then, the mixtures were added to Vero E6 cells pre-seeded in 96-well flat-bottom tissue culture plates and incubated at 37°C, 5% CO<sub>2</sub> for 72 h. Residual virus in the supernatants was titrated by TCID<sub>50</sub> assay.

**A**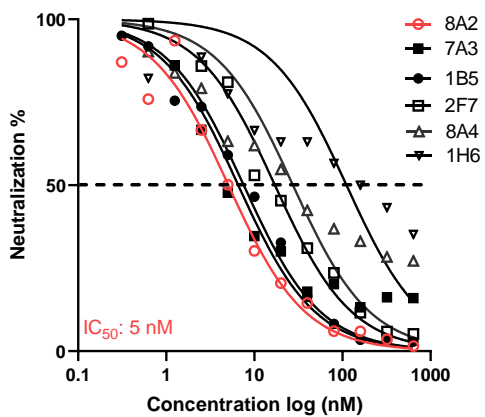**B**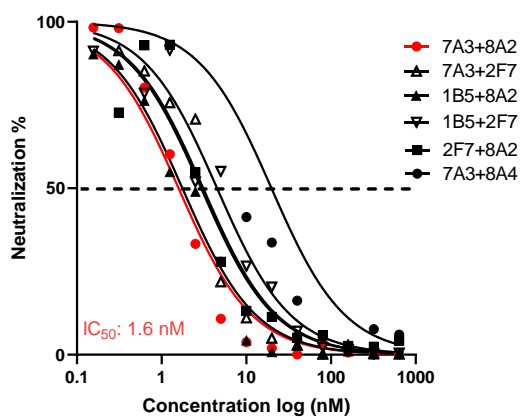**C**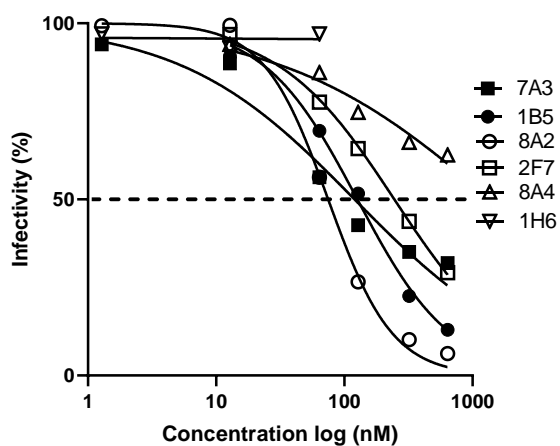**D**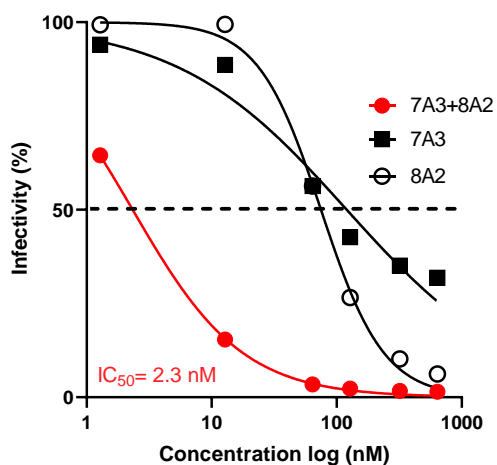

**Fig. S7.** Neutralization assay on SARS-CoV-2 (Wuhan-Hu-1). **A, B)** Lentivirus-based pseudovirus assays. **C, D)** Fluorescence reporter assays.



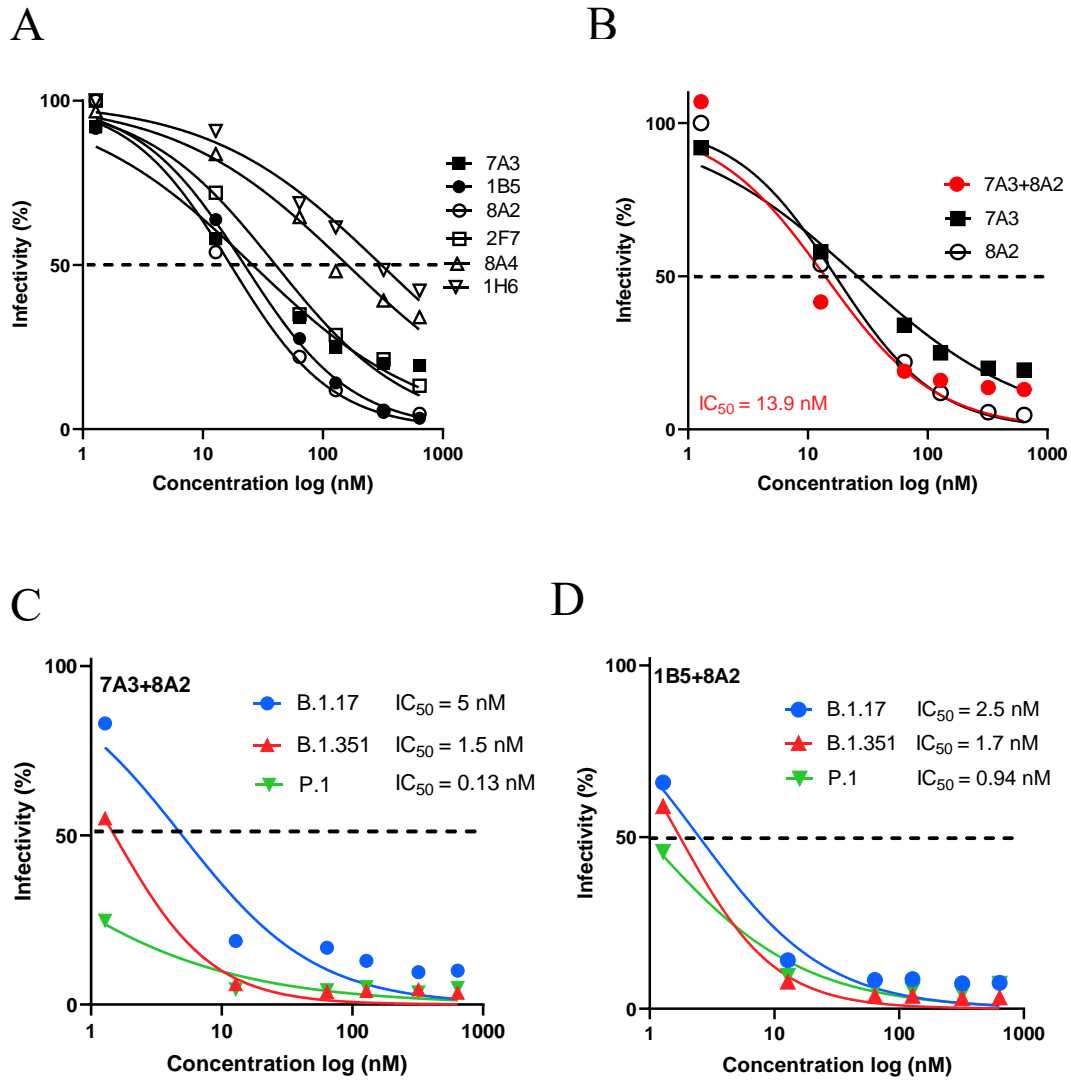

**Fig. S8.** Neutralization of the variants of SARS-CoV-2 pseudoviral infection. **A, B)** Fluorescence reporter assays using D614G variant. **C, D)** Fluorescence report assays using B.1.1.7, B.1.351, and P.1 variants.

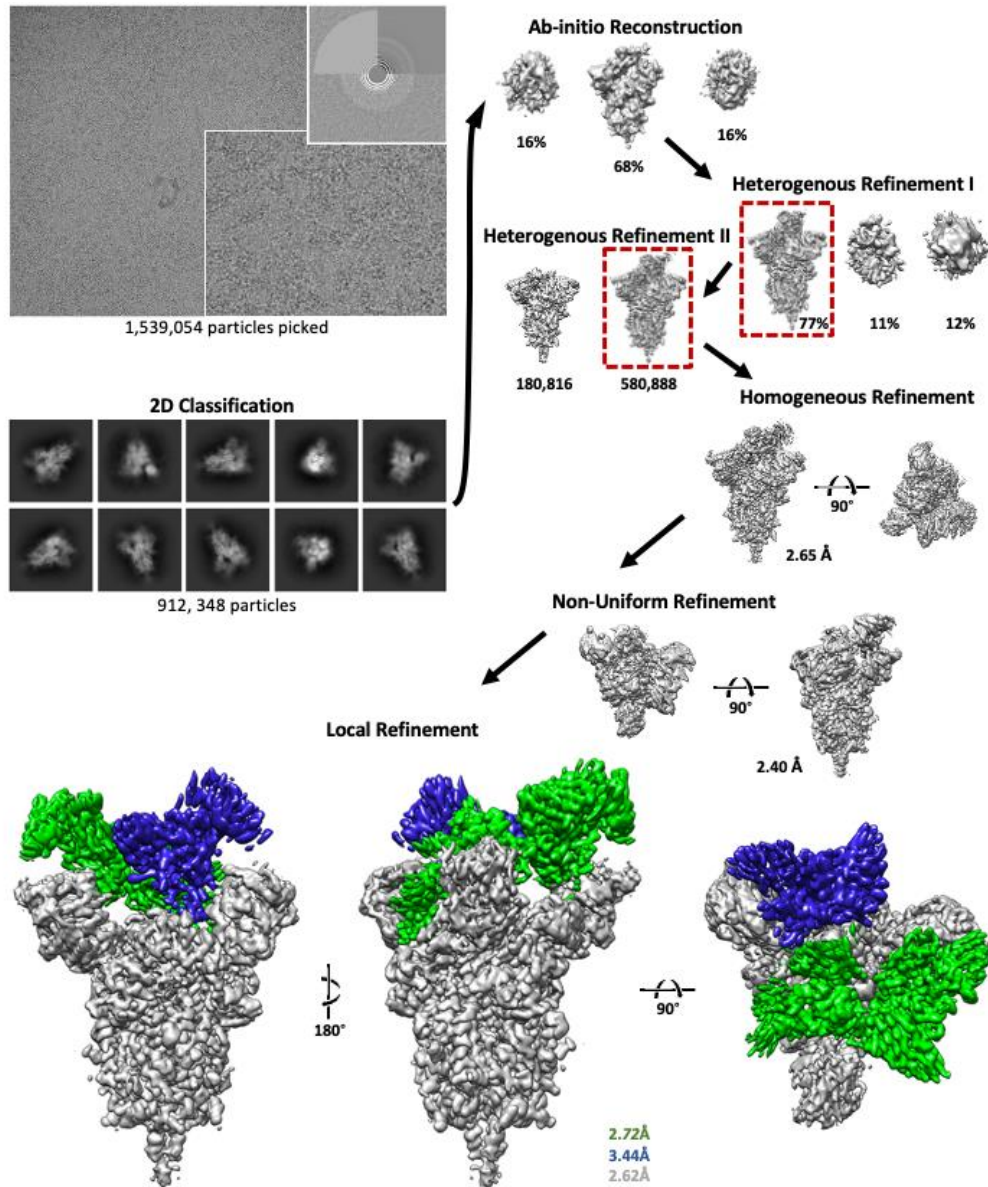

**Fig. S9.** Cryo-EM image processing workflow for S-protein ectodomain in complex with 7A3 and 8A2. A total of 1,539,054 particles selected from 4,644 micrographs were subject to 2D classification. Class selection yielded 912,348, which were used to generate three initial maps by Ab-initio reconstruction, followed by two cycles of heterogeneous refinement and a third non-uniform refinement step, and a final refinement focused on the RBDs.

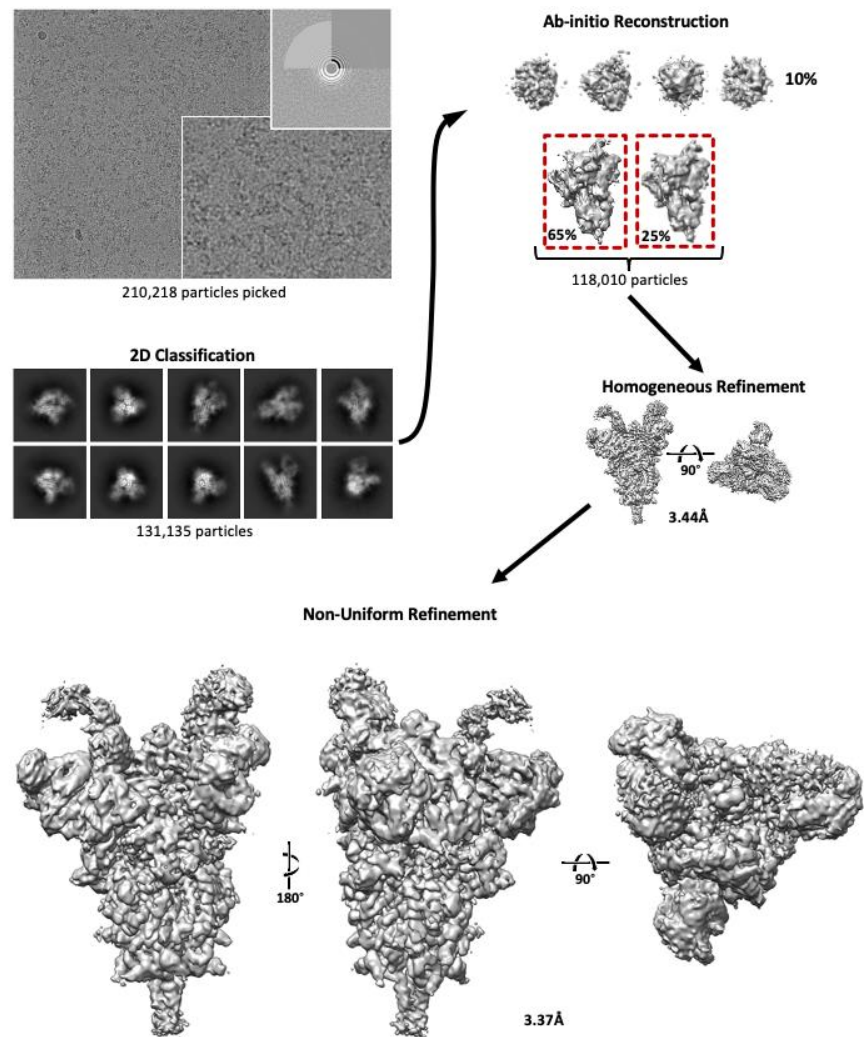

**Fig. S10.** Cryo-EM image processing workflow for S-protein ectodomain in complex with 8A2. A total of 210,218 particles selected from 2149 micrographs were subject to 2D classification. Class selection yielded 131,135 which were used to generate three initial maps by Ab-initio reconstruction, followed by heterogeneous refinement and non-uniform refinement.

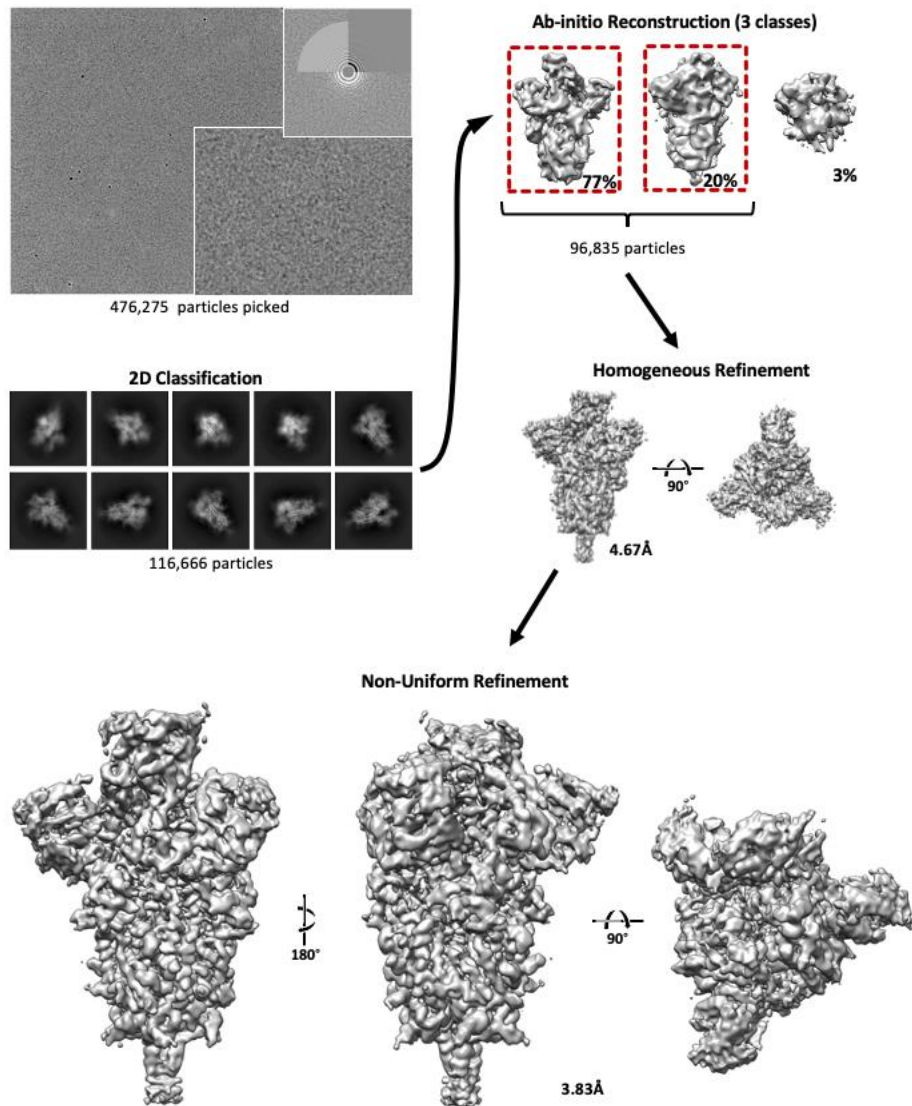

**Fig. S11.** Cryo-EM image processing workflow for S-protein ectodomain in complex with 7A3. A total of 476,275 particles selected from 3,198 micrographs were subject to 2D classification. Class selection yielded 116,666, which were used to generate three initial maps by Ab-initio reconstruction, followed by heterogeneous refinement and non-uniform refinement.

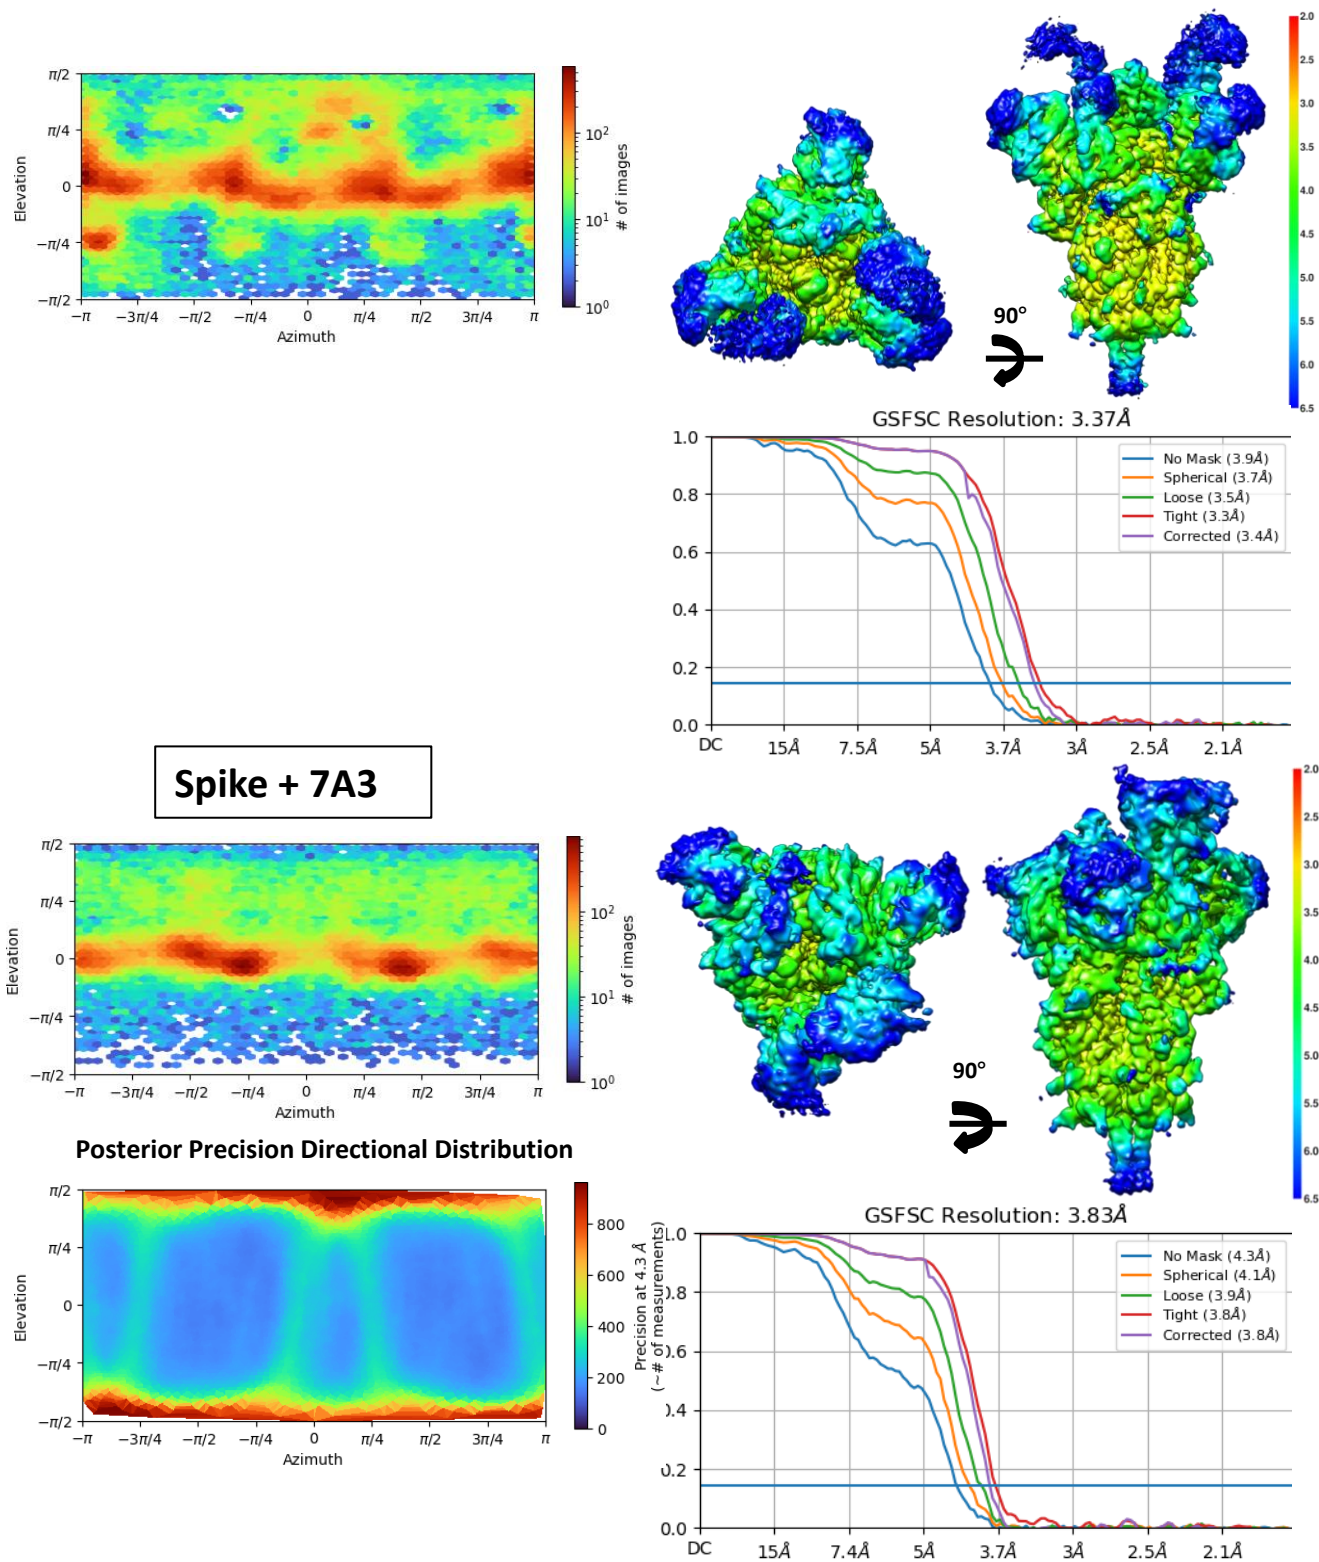

**Fig. S12.** Image Processing Statistics of the Cryo-EM maps for the interaction of SARS-CoV-2 spike protein with 8A2 or 7A3 V<sub>H</sub>H.

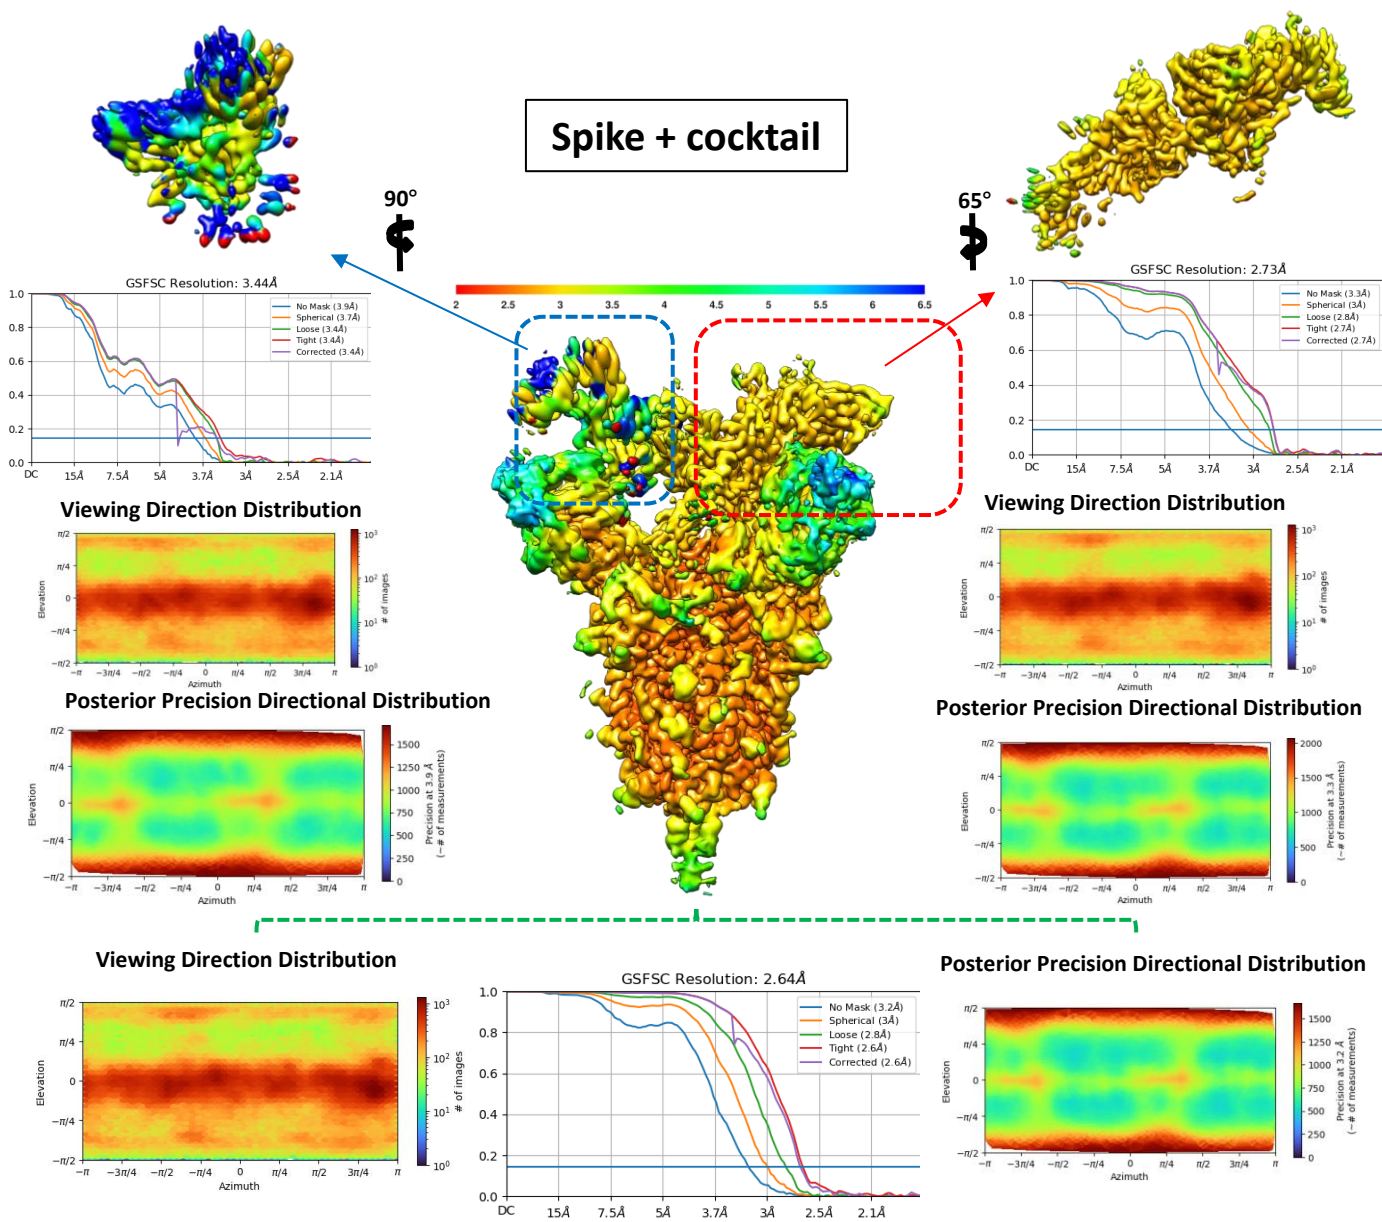

**Fig. S13.** Image Processing Statistics of the Cryo-EM map for the interaction of SARS-CoV-2 spike protein with 8A2 and 7A3 V<sub>H</sub>H nanobody cocktail.

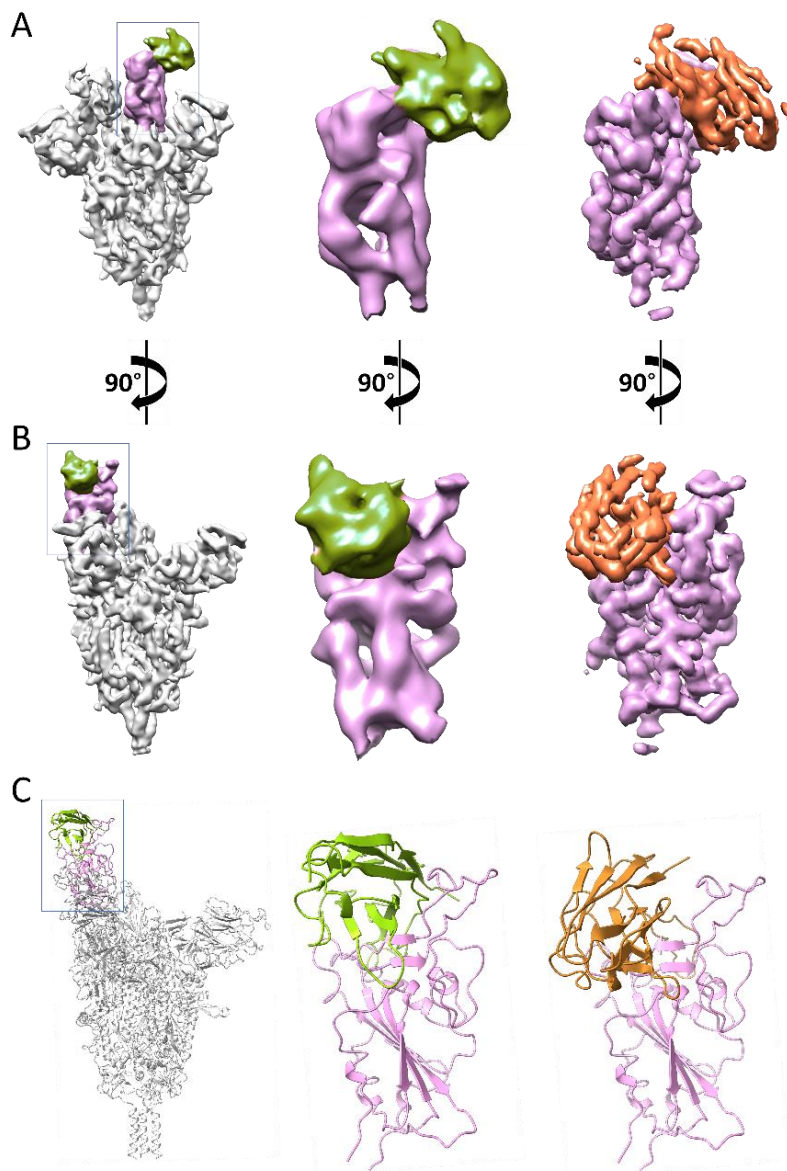

**Fig. S14.** The 2F7 V<sub>H</sub>H/spike map and its comparison to the 8A2 V<sub>H</sub>H/spike complex structure. **A)** From left to right, the first panel shows the 2F7 V<sub>H</sub>H/spike complex map, RBD is colored purple and 2F7 in green. The second panel shows an enlarged section indicated in the first panel with a bounding box in light blue; the third panel shows the RBD-8A2 complex map in a similar orientation as the middle panel. **B)** Same as A with the structures rotated 90° clockwise around the vertical axis. **C)** Structural models of 2F7 and 8A2 complexes in the same orientation as in B. The 2F7 map resolution is insufficient to resolve the features of the nanobody but unambiguously identifies the general epitope area, confirming 2F7 shares the same binding loci as 8A2. A refined structure of the 2F7 complex cannot be generated due to the low resolution of the map. 2F7 pose in panel C was generated by manually correcting the overall fitting of a 2F7 model to the map using the program Chimera version 1.14 using a homologous model of 2F7 generated from the coordinates of 8A2.

[Q]CVNLTTRTQLPPAYTNSFTRGVYYPDKVFRSSVLHSTQDLFLPFFSNVTWFHA  
IHVSGTNGTKRFDNPVLPFNDGVYFASTEKSNIIRGWIFGTTLDSKTQSLIVNNA  
TNVVIKVCEFQFCNDPFLGVYYHKNNKSWMESEFRVYSSANNCTFEYVSQPFLM  
DLEGKQGNFKNLREFVFKNIDGYFKIYSKHTPINLVRDLPQGFSALEPLVDLPIGI  
NITRFQTLALHRSYLTPGDSSSGWTAGAAAYYVGYLQPRTFLLKYNENGTITDA  
VDCALDPLSETKCTLKSFTVEKGIYQTSNFRVQPTESIVRFPNITNLCPFGEVFNAT  
RFASVYAWNRKRISNCVADYSVLYNSASFSTFKCYGVSPTKLNLDLCFTNVYADS  
FVIRGDEVQRQIAPGQTGKIADYNYKLPDDFTGCVIAWNSNNLDSKVGGNYNLY  
RLFRKSNLKPFERDISTEIYQAGSTPCNGVEGFNCYFPLQSYGFQPTNGVGYQPY  
RVVLSFELLHAPATVCGPKKSTNLVKNKCVNFNFNGLTGTGVLTESNKKFLPF  
QQFGRDIADTTDAVRDPQTLEILDITPCSFGGVSVITPGTNTSNQVAVLYQDVNCT  
EVPVAIHADQLTPTWRVYSTGSNVFQTRAGCLIGAEHVNNSYECDIPIGAGICAS  
YQTQTNSPGSASSVASQSIIAYTMSLGAENSVAYSNNNSIAIPTNFTISVTTEILPVS  
MTKTSVDCTMYICGDSSTECNLLLQYGSFCTQLNRALTGIAVEQDKNTQEVFAQ  
VKQIYKTPPIKDFGGFNFSQILPDPSKPSKRS**P**IEDLLFNKVTLADAGFIKQYGDCL  
GDIAARDLICAQKFNGLTVLPPLLTDEMIAQYTSALLAGTITSGWTFGAG**P**ALQIP  
**F**PMQMAYRFNGIGVTQNVLYENQKLIANQFN**S**AIGKIQDSL**S**ST**P**SALGKLQDVV  
NQNAQALNTLVKQLSSNFGA**I**SSV**L**NDIL**S**R**L**D**P**PEAEVQIDRLITGRLQSLQTYV  
TQQLIRAAEIRASANLAATKMSECVLGQSKRVDFCGKGYHLMSFPQSAPHGVVF  
LHVTYVPAQEKNFTTAPAICHGDKAHFPREGVVFVSN**G**THWFVTQRNFYEPQIIT  
DNTFVSGNCDVVIGIVNNTVYDPLQPELDSFKEELDKYFKNHTSPD**V**DLGDISGI  
NASVVNIQKEIDRLNEVAKNLNESLIDLQELGKYEQSGGY**I**PEAPRDGQAYVRKD  
GEWVLLSTFLGRSLEVL**F**QGP**G**HHHHHHHSAWSHPQFEKGGGSGGGSGGSA  
WSHPQFEK

**Fig. S15.** The protein sequence of stabilized SARS-CoV-2 S protein used for the cryo-EM V<sub>H</sub>H complex structures in the present study. N-terminus is a cyclized glutamine (pyroglutamic acid). Six proline substitutions are bold in red.



| V <sub>H</sub> H-Fc | Wuhan-Hu-1 | D614G | N501Y | B.1.1.7 | B.1.351 | P.1 | B.1.617.2 |
|---------------------|------------|-------|-------|---------|---------|-----|-----------|
|                     | KD (nM)    |       |       |         |         |     |           |
| 8A2                 | 0.26       | 0.2   | 0.11  | 0.001   | 0.001   | 0.5 | NB        |
| 1B5                 | 0.1        | 0.2   | 0.12  | 0.03    | 0.26    | 0.5 | 0.14      |
| 7A3                 | 0.2        | 0.23  | 0.25  | 0.2     | 0.1     | 0.8 | 0.42      |
| 2F7                 | 0.85       | 1     | 0.85  | 3.2     | NB      | NB  | NB        |
| 8A4                 | 0.16       | 0.6   | 0.5   | 5.6     | NB      | NB  | NB        |
| 1H6                 | 37         | 23    | 47    | 17      | NB      | NB  | NB        |

|            | V <sub>H</sub> H-Fc | KD Error | Kon (1/Ms) | Kon Error | Kdis (1/s) | Kdis Error |
|------------|---------------------|----------|------------|-----------|------------|------------|
| Wuhan-Hu-1 | 7A3                 | 1.13E-12 | 2.23E+05   | 5.31E+02  | 4.34E-05   | 2.30E-07   |
|            | 1B5                 | 1.64E-12 | 3.02E+05   | 7.79E+02  | 6.70E-05   | 4.65E-07   |
|            | 2F7                 | 6.67E-12 | 2.59E+05   | 1.78E+03  | 2.19E-04   | 8.42E-07   |
|            | 8A2                 | 1.77E-12 | 7.38E+04   | 2.37E+02  | 1.93E-05   | 1.15E-07   |
|            | 8A4                 | 1.02E-12 | 2.32E+05   | 5.19E+02  | 3.74E-05   | 2.21E-07   |
|            | 1H6                 | 2.09E-11 | 8.26E+05   | 2.50E+04  | 5.36E-04   | 5.90E-06   |
| B.1.1.7    | 7A3                 | 1.56E-12 | 3.18E+05   | 8.00E+02  | 7.94E-05   | 4.54E-07   |
|            | 1B5                 | 1.13E-12 | 3.49E+05   | 7.68E+02  | 4.12E-05   | 3.83E-07   |
|            | 2F7                 | 8.58E-12 | 3.72E+05   | 3.14E+03  | 3.17E-04   | 1.74E-06   |
|            | 8A4                 | 2.69E-12 | 1.99E+05   | 5.34E+02  | 9.80E-05   | 4.66E-07   |
|            | 8A2                 | 1.33E-12 | 9.95E+04   | 1.19E+02  | 1.13E-05   | 1.31E-07   |
|            | 1H6                 | 1.39E-11 | 9.35E+05   | 2.58E+04  | 4.43E-04   | 4.43E-06   |
| B.1.351    | 7A3                 | 6.42E-12 | 1.64E+05   | 7.04E+02  | 1.30E-04   | 8.94E-07   |
|            | 1B5                 | 3.04E-12 | 2.81E+05   | 7.14E+02  | 1.33E-04   | 7.83E-07   |
|            | 8A2                 | 7.80E-12 | 7.05E+04   | 3.84E+02  | 3.70E-05   | 5.12E-07   |
| P.1        | 7A3                 | 6.42E-12 | 1.64E+05   | 7.04E+02  | 1.30E-04   | 8.94E-07   |
|            | 1B5                 | 3.04E-12 | 2.81E+05   | 7.14E+02  | 1.33E-04   | 7.83E-07   |
|            | 8A2                 | 7.80E-12 | 7.05E+04   | 3.84E+02  | 3.70E-05   | 5.12E-07   |
| B.1.617.2  | 7A3                 | 3.09E-12 | 2.48E+05   | 8.98E+02  | 1.07E-04   | 6.64E-07   |
|            | 1B5                 | 1.06E-12 | 2.99E+05   | 5.19E+02  | 4.22E-05   | 3.08E-07   |

**Table S1.** Binding of SARS-CoV-2 V<sub>H</sub>H-Fc fusions against the RBD of the original Wuhan-Hu-1 and variants on Octet. NB: no binding.

| Assay                 | LP assay   | PP entry assay |         |         |     | Fluorescent reporter assay |       |         |         |      |
|-----------------------|------------|----------------|---------|---------|-----|----------------------------|-------|---------|---------|------|
| V <sub>HH</sub>       | Wuhan-Hu-1 | Wuhan-Hu-1     | B.1.1.7 | B.1.351 | P.1 | Wuhan-Hu-1                 | D614G | B.1.1.7 | B.1.351 | P.1  |
| IC <sub>50</sub> (nM) |            |                |         |         |     |                            |       |         |         |      |
| 8A2                   | 5          | 14             | 2       | 1       | 0.5 | 74.8                       | 17    |         |         |      |
| 1B5                   | 7.6        | 25             |         | 5       | 5   | 127                        | 22.2  |         |         |      |
| 7A3                   | 6.6        | 3              | 0.6     | 1       | 2   | 246                        | 40.4  |         |         |      |
| 2F7                   | 8.6        | 15             | 10      |         |     | 120                        | 26    |         |         |      |
| 8A4                   | 27.4       |                |         |         |     | 1388                       | 160   |         |         |      |
| 1H6                   | 111.3      |                |         |         |     |                            | 308   |         |         |      |
| 8A2+7A3               | 1.6        | 1              | 0.4     | 0.3     | 0.2 | 2.3                        | 13.9  | 5       | 1.5     | 0.13 |
| 8A2+1B5               | 1.8        | 5              | 0.9     | 0.5     | 0.3 | 12.6                       | 14.8  | 2.5     | 1.7     | 0.94 |
| 7A3+2F7               | 2.9        | 1              | 0.5     | 1       | 5   | 20.1                       | 17.6  | 2.5     | 25.6    | 3.8  |
| 7A3+8A4               | 19.8       |                |         |         |     | 35.7                       |       |         |         |      |
| 8A2+2F7               | 3.1        |                |         |         |     | 40.3                       | 39.8  | 40      | 2.6     | 1.6  |
| 1B5+2F7               | 4.5        | 4              | 1       | 7       | 2   | 33.5                       | 28.7  | 8       | 14.9    | 26.1 |

LP: lentivirus-based pseudovirus

PP: Pseudotyped particle

**Table S2.** Testing of SARS-CoV-2 V<sub>HH</sub>-Fc fusion proteins and combinations against the infection of pseudovirus expressing the original Wuhan-Hu-1 or variant spike protein.

| Assay           | Live viral microneutralization assay |       |         |         |      |           | Cytopathic assay      |
|-----------------|--------------------------------------|-------|---------|---------|------|-----------|-----------------------|
| V <sub>HH</sub> | Wuhan-Hu-1                           | D614G | B.1.1.7 | B.1.351 | P.1  | B.1.617.2 | Wuhan-Hu-1            |
|                 | IC <sub>50</sub> (nM)                |       |         |         |      |           | IC <sub>50</sub> (nM) |
| 8A2             | 72                                   | 23    | 17      | 2       | 0.16 | NA        | 72                    |
| 1B5             | 18                                   | 12    | 140     | 22      | 1    |           | 242                   |
| 7A3             | 46                                   | 4     | 25      | 7       | 1.4  | 19        | 56                    |
| 2F7             | 36                                   | 13    | 186     | NA      | NA   |           | 169                   |
| 8A4             |                                      |       |         |         |      |           | 108                   |
| 1H6             |                                      |       |         |         |      |           | 1125                  |
| 8A2+<br>7A3     | 1                                    | 6     | 2       | 0.87    | 0.14 | 27        | 20                    |
| 8A2+<br>1B5     |                                      |       |         |         |      |           | 47                    |
| 7A3+<br>2F7     | 1.5                                  | 12    | 5       | 27      | 1    |           | 16                    |
| 7A3+<br>8A4     |                                      |       |         |         |      |           | 35                    |
| 8A2+<br>2F7     | 15                                   | 76    | 44      | 3       | 0.6  |           | 97                    |
| 1B5+<br>2F7     |                                      |       |         |         |      |           | 40                    |

NA: no activity

**Table S3.** Testing of SARS-CoV-2 V<sub>HH</sub>-hFc fusion proteins and combinations against Wuhan-Hu-1 and emerging variant live viruses. NA, no activity.

| Dataset       | Hexapro/7A3  | Hexapro/8A2  | Hexapro/7A3/8A2<br>I | Hexapro/7A3/8A2<br>II |
|---------------|--------------|--------------|----------------------|-----------------------|
| Microscope    | Arctica      | Arctica      | Arctica              | Krios                 |
| Voltage (KeV) | 200          | 200          | 200                  | 300                   |
| Detector      | K2           | K2           | K2                   | K3                    |
| GIF slit (eV) | N/A          | N/A          | N/A                  | 20                    |
| Frames        | 60           | 60           | 60                   | 50                    |
| Exposure (s)  | 9            | 9            | 7.8                  | 4.49                  |
| Flux (e/A)    | 6.51         | 6.18         | 6.4                  | 3.75                  |
| Pixel size    | 0.932        | 0.932        | 0.932                | 0.528                 |
| Mode          | Counting     | Counting     | Counting             | Super-Res             |
| Defocus Range | (-1.5, -2.2) | (-1.5, -2.2) | (-1.5, -2.2)         | (-1.2, -2.2)          |

**Table S4.** Cryo-EM datasets.

| <b>Primers</b>    | <b>Sequence (5'-3')</b>                        |
|-------------------|------------------------------------------------|
| <b>CamelS1-F</b>  | TACCGTGGCCCAGGCGGCC<br>GAGGTGCAGCTGGTGGAGTCTGG |
| <b>CamelS2-F</b>  | TACCGTGGCCCAGGCGGCC<br>CAGGTGCAGCTGGTGGAGTCTGG |
| <b>CamelS3-F</b>  | TACCGTGGCCCAGGCGGCC<br>GCGGTGCAGCTGGTGGAGTCTGG |
| <b>CamelS4-F</b>  | TACCGTGGCCCAGGCGGCC<br>GATGTGCAGCTGGTGGAGTCTGG |
| <b>CamelS5-F</b>  | TACCGTGGCCCAGGCGGCC<br>CAGGTAAAGCTGGAGGAGTCTGG |
| <b>CamelS6-F</b>  | TACCGTGGCCCAGGCGGCC<br>GCCGTGCAGCTGGTGGATTCTGG |
| <b>CamelVHH-R</b> | GGTGGCCGGCCTGGCCACT<br>TGAGGAGACGGTGACCTGGGTCC |
| <b>Vector-F</b>   | GGCCAGGCCGGCCACCACC                            |
| <b>Vector-R</b>   | GCGAAACCAGCCAGTGCCACTGC                        |
| <b>F-linker</b>   | TACCGTGGCCCAGGCGGCC                            |

**Table S5.** The primers used to amplify camel V<sub>H</sub>H regions, vector backbone, and EASeL overlap extension PCR. Six different forward primers (CamelS1-6F) were used to clone camel V<sub>H</sub>H fragments. Vector-F and Vector-R were used for amplification of the pComb3X phagemid vector backbone. F-linker and Vector-R were used in the EASeL overlap extension PCR.
